# Supplementary material for: A new technique for the direct detection of HO 2 radicals using bromidechemical ionization mass spectrometry (Br-CIMS): initial characterization
Source: Copernicus journal article supplement (doi:10.5194/amt-9-3851-2016), 2016-08-19
Supplement: Supplementary file 1 [file amt-9-3851-2016-supplement.pdf]

Supplement of Atmos. Meas. Tech., 9, 3851–3861, 2016  
<http://www.atmos-meas-tech.net/9/3851/2016/>  
doi:10.5194/amt-9-3851-2016-supplement  
© Author(s) 2016. CC Attribution 3.0 License.

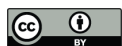

*Supplement of*

## **A new technique for the direct detection of HO<sub>2</sub> radicals using bromide chemical ionization mass spectrometry (Br-CIMS): initial characterization**

**Javier Sanchez et al.**

*Correspondence to:* Nga L. Ng (ng@chbe.gatech.edu)

The copyright of individual parts of the supplement might differ from the CC-BY 3.0 licence.

**Table S1:** HO<sub>2</sub> measurement uncertainties for each parameter in the HO<sub>2</sub> calculation from Eq. 1.  $S_{\text{HO}_2}$  refers to the HO<sub>2</sub> signal fluctuation in the CIMS using 1 minute time resolution data.

| <b>Parameter</b>                          | <b>Uncertainty (1<math>\sigma</math> %)</b> |
|-------------------------------------------|---------------------------------------------|
| $\sigma_{\text{water}, 184.9 \text{ nm}}$ | 3                                           |
| $I$                                       | 17                                          |
| [H <sub>2</sub> O]                        | 1.5                                         |
| $\Delta t$                                | 3                                           |
| $S_{\text{HO}_2}$                         | 3                                           |
| <b>Total calibration uncertainty</b>      | <b>18</b>                                   |

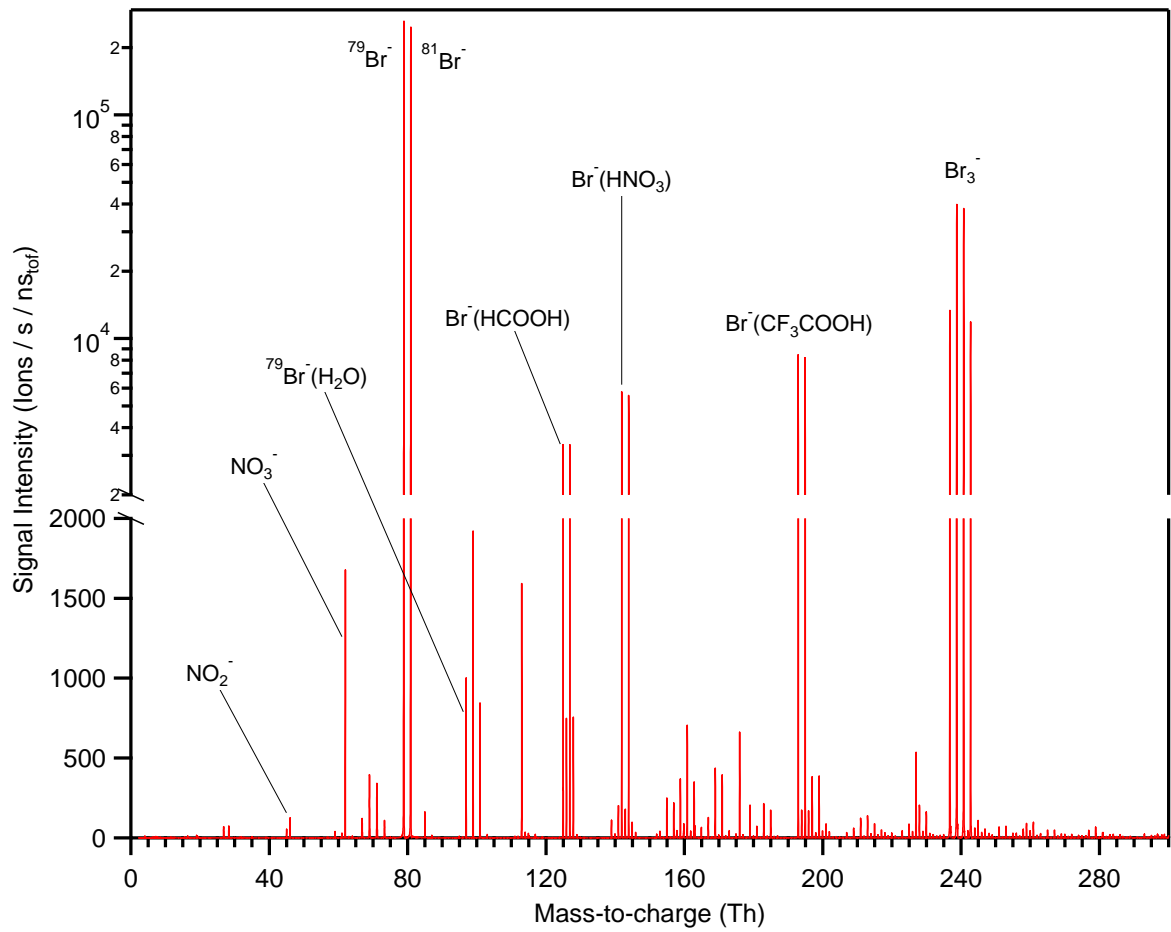

**Figure S1:** Full Br<sup>-</sup> ionization mass spectrum up to  $m/z$  300. Large, commonly detected peaks are labeled. The y-axis displays the signal intensity in ions/second normalized by time-of-flight of species. Integration over the time-of-flight axis is required to determine signal intensity.

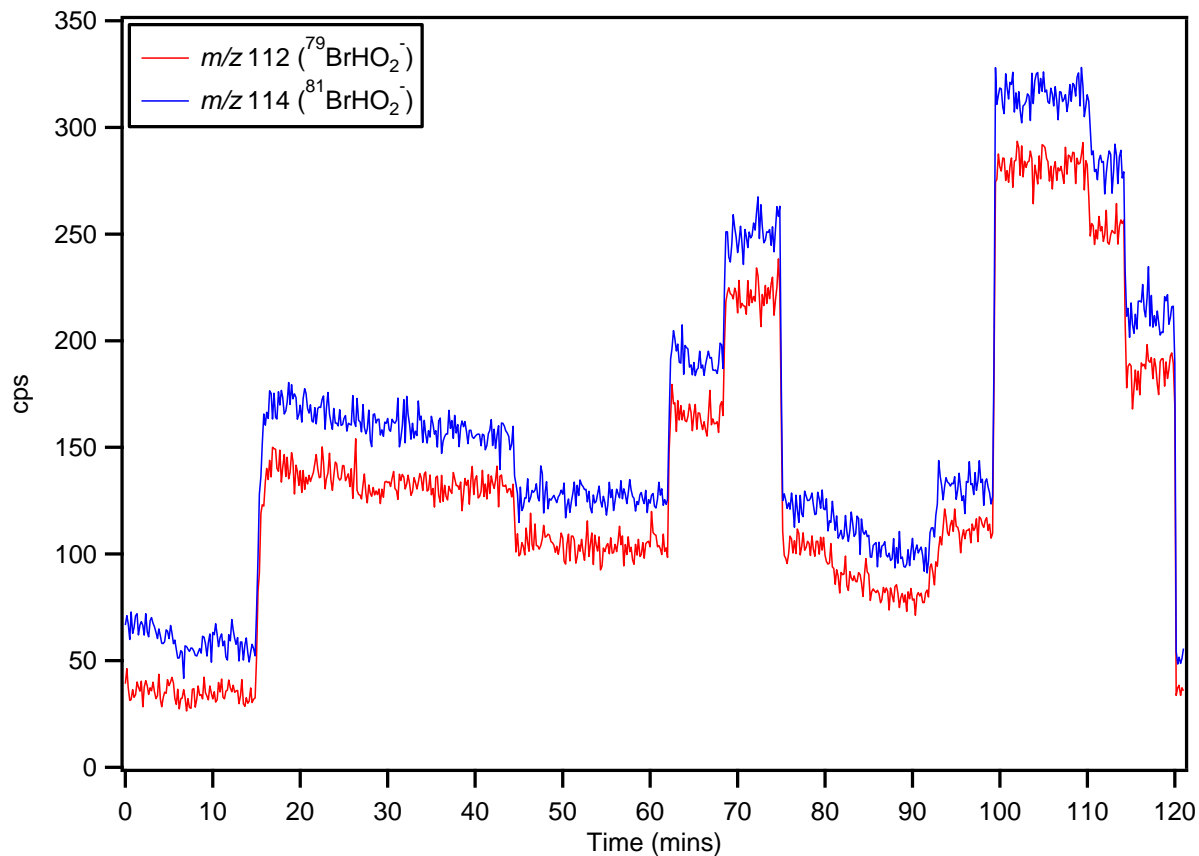

**Figure S2:** Time series of laboratory calibration of HO<sub>2</sub> at both mass-to-charges where HO<sub>2</sub> is observed. Points are averaged to 10 seconds to better display instrument response to changes in generated HO<sub>2</sub>. At time zero, no HO<sub>2</sub> is being generated in the sample line. The mercury lamp is turned on at 15 minutes, resulting in an increase in signal. The small decrease in signal between 20 and 40 minutes is due to decreasing relative humidity in the sample line due to cooling in the bubbler from water evaporation. The lowest point above the background (~90 minutes) corresponds to 2.6 ppt of HO<sub>2</sub>. The higher background associated with *m/z* 114 is due to contribution from the isotope of a trifluoroacetic acid (*m/z* 113) contamination associated with Teflon<sup>TM</sup> tubing.

## **HNO<sub>4</sub> measurement calculation to infer HO<sub>2</sub> abundance and comparison with Br<sup>-</sup>(HO<sub>2</sub>) measurements**

During the ambient sampling period, HNO<sub>4</sub> measurements were made using a quadrupole CIMS with I reagent. The I(HNO<sub>4</sub>) cluster was measured at  $m/z$  206. The HNO<sub>4</sub> background was obtained by passing the gas sample through a charcoal scrubber periodically. The HNO<sub>4</sub> was calibrated by passing a small flow of UHP (99.999%) N<sub>2</sub> through a U-tube containing a small amount of synthesized HNO<sub>4</sub>. The gas was then diluted to obtain varying HNO<sub>4</sub> concentrations. HNO<sub>4</sub> was quantified by thermal decomposition to NO<sub>2</sub> and subsequent measurement using a Cavity Attenuated Phase-Shift NO<sub>2</sub> monitor (Aerodyne Inc.).

HO<sub>2</sub> concentrations were also inferred via HNO<sub>4</sub> and NO<sub>2</sub> measurements based on the equilibrium, HO<sub>2</sub>+NO<sub>2</sub>←→HNO<sub>4</sub> (Eq. S1).

$$[\text{HO}_2] = \frac{[\text{HNO}_4]}{K(T)[\text{NO}_2]}, \quad (\text{S1})$$

where the equilibrium constant  $K(T)$  is a function of temperature alone (Burkholder et al. (2015)).  $K(T)$  in Eq. (S1) has 30% uncertainty in this temperature range (Burkholder et al., 2015). The uncertainty of the HO<sub>2</sub>NO<sub>2</sub> measurement was 16%, resulting in an overall uncertainty of 34% in the inferred HO<sub>2</sub> concentration. The precision of the NO<sub>2</sub> measurement is <100 ppt for a 10 s average time, and thus the NO<sub>2</sub> measurement did not contribute significantly to the uncertainty in the inferred HO<sub>2</sub>. During the period over which observations were made, the temperature was > 27°C and the lifetime of HNO<sub>4</sub> was less than 20 s. The validity of the equilibrium assumption made in Eq. S1 at the sampling site is determined by the time scale of fluctuations of NO and NO<sub>2</sub>, which can be rapid given the site's proximity to an interstate. For the purpose of the comparison in Fig. S3, the effects of deviations from equilibrium are expected to be small, given the use of hourly median values. A detailed analysis of the inference of HO<sub>2</sub> via HNO<sub>4</sub> will be found in Chen et al. (2016, in preparation).

The HO<sub>2</sub> inferred from HNO<sub>4</sub> measurements was compared to the HO<sub>2</sub> measured using Br<sup>-</sup> ionization. The results of that comparison are shown in Fig. S3. The two measurements peak around the same time of day but the HO<sub>2</sub> mixing ratios suggested by both differ by at least a factor of 5 during the afternoon. This is likely due to a combination of factors, including a potential positive bias in the HNO<sub>4</sub> measurement and uncertainties associated with the HO<sub>2</sub> sensitivity during ambient sampling. The sensitivity of the direct HO<sub>2</sub> measurement was

determined in the laboratory and online calibrations were not conducted. It is possible that the sensitivity during ambient measurements was lower due to specific sampling conditions. In particular, the instrument experienced temperature fluctuations between 20 and 40°C. We performed laboratory experiments to evaluate the effect of temperature on instrument sensitivity and found a 20% decrease in sensitivity at 40°C as compared to the sensitivity at 20°C. Furthermore, environmental conditions resulted in corrosion of the critical orifice on the HR-ToF-CIMS, which lowered the sample flow by 35%. The sensitivity was not corrected for the lower sample flow as the time at which the sample flow decreased was not known with certainty. The use of HNO<sub>4</sub> measurements to infer HO<sub>2</sub> has yet to be validated. The discrepancy between both methods of obtaining HO<sub>2</sub> should be the subject of future work.

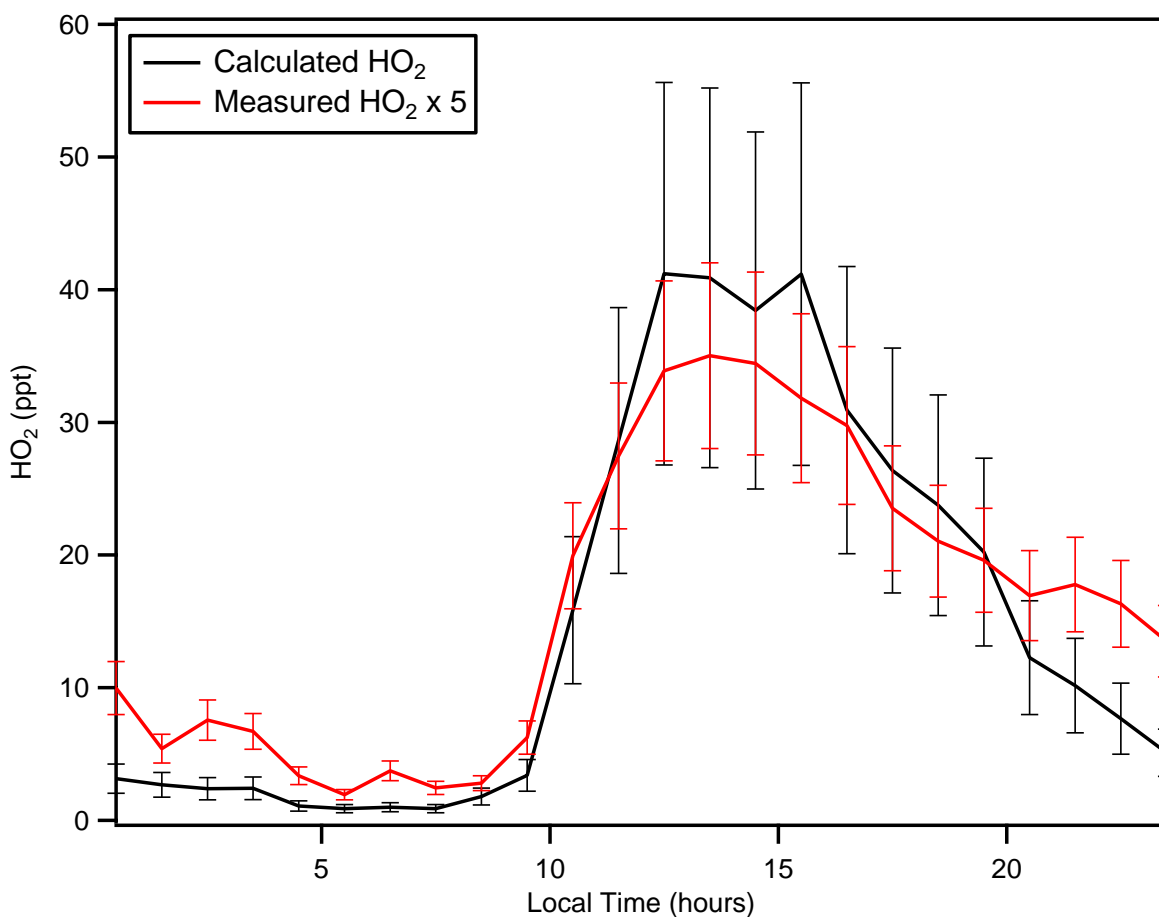

**Figure S3:** Comparison of HO<sub>2</sub> diurnal profiles (6/15/2015 to 6/18/2015) for measured HO<sub>2</sub> and HO<sub>2</sub> calculated assuming equilibrium between HO<sub>2</sub> and HNO<sub>4</sub>. The measured HO<sub>2</sub> signal has been corrected by subtracting the contribution from internal generation of HO<sub>2</sub>. The uncertainty in the measured HO<sub>2</sub> is attributed to the combined

uncertainties from the calibration parameters in Eqn. 1. The uncertainty in calculated  $\text{HO}_2$  only takes into account uncertainties in the equilibrium constant and the  $\text{HNO}_4$  calibration.

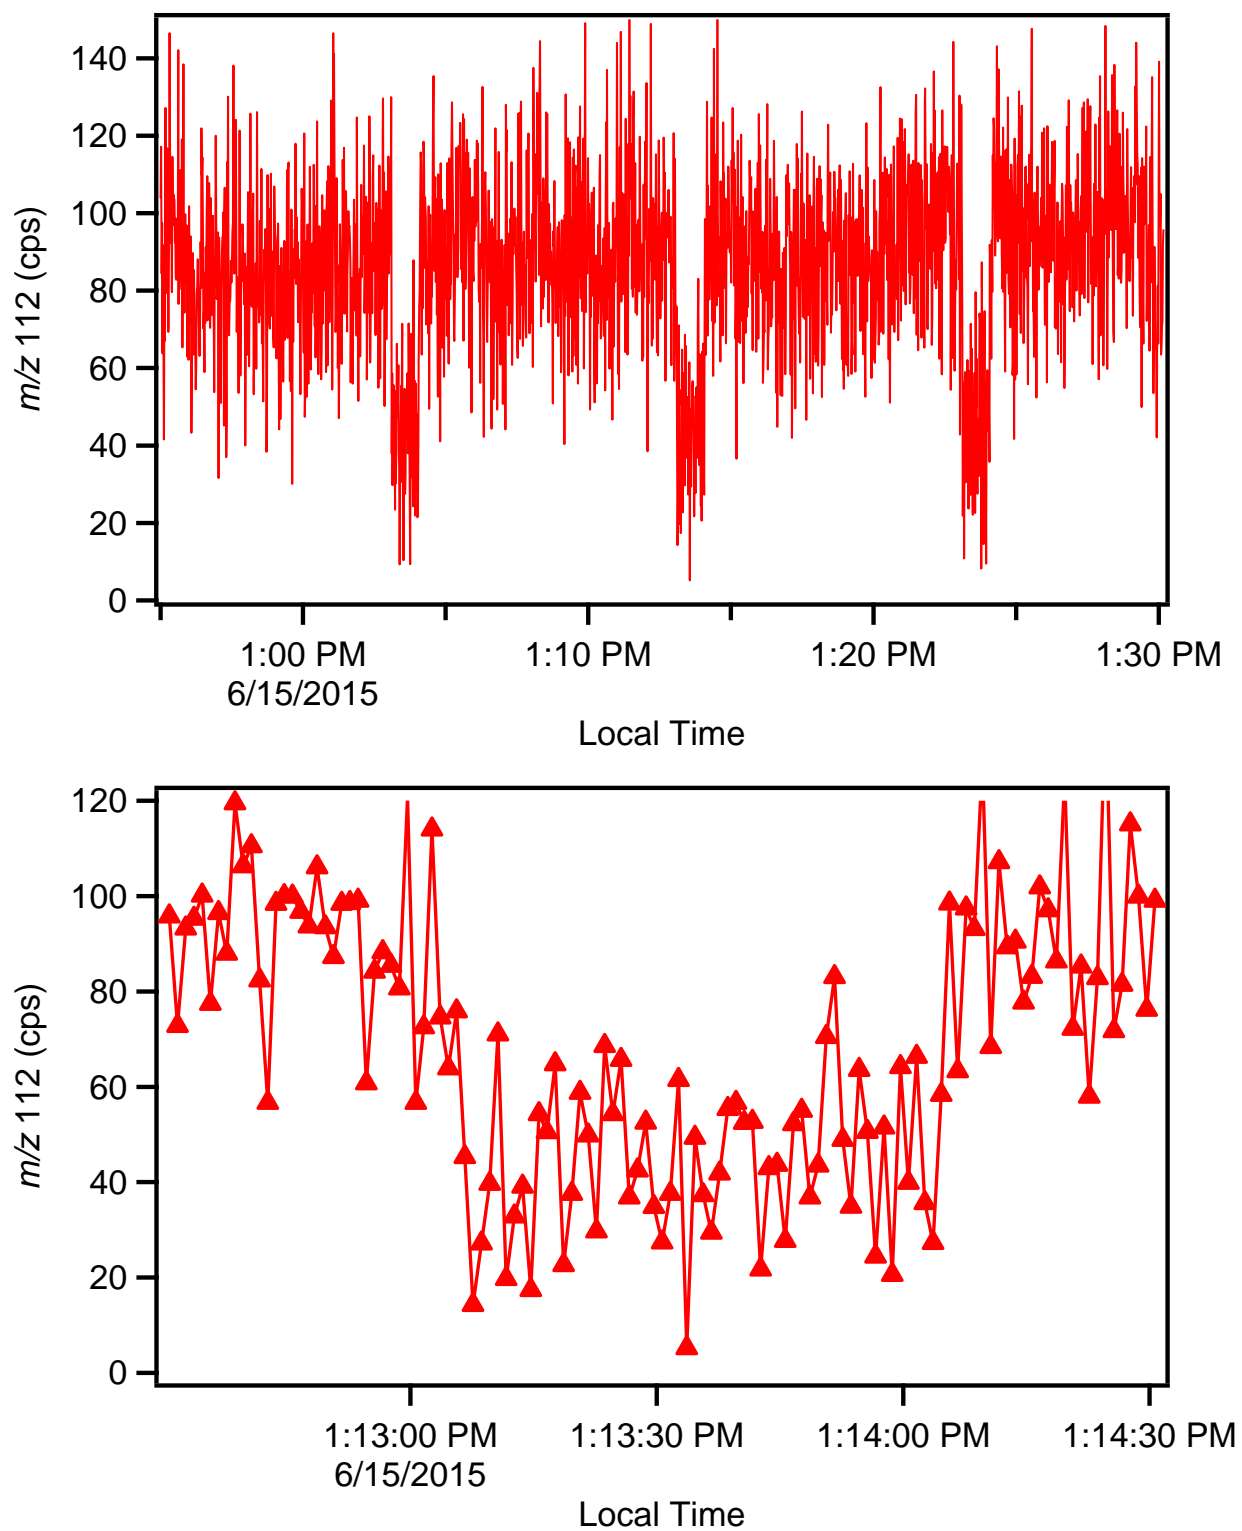

**Figure S4:** Raw  $m/z$  112 time series data, 1 second time resolution. Three background periods using NO addition are shown in the top panel. The middle background period is shown more closely in the bottom panel. Each marker is a 1 second data point. The response time associated with the NO background is only a few seconds.



## References

- Burkholder, J. B., Sander, S. P., Abbatt, J., Barker, J. R., Huie, R. E., Kolb, C. E., Kurylo, M. J., Orkin, V. L., Wilmouth, D. M., and Wine, P. H.: "Chemical Kinetics and Photochemical Data for Use in Atmospheric Studies, Evaluation No. 18," JPL Publication 15-10, Jet Propulsion Laboratory, Pasadena, 2015.
- Chen, D., Huey, L. G., Tanner, D. J., Li, J., Ng, N. L., and Wang, Y. H.: Inferring hydroperoxyl radical ( $\text{HO}_2$ ) in an urban site via the measurement of pernitric acid ( $\text{HO}_2\text{NO}_2$ ) using chemical ionization mass spectrometry (CIMS), in preparation, to be submitted to Atmos. Meas. Tech., 2016.
